# Supplementary material
Source: publisher figshare collection journal article supplement (https://gsapubs.figshare.com/ndownloader/files/23293343)
Supplement: Supplementary file 1 [file 23293343]

**Supplementary Material Captions**

Figure DR1. Detailed bathymetry of diapir-related bathymetric high highlighting mound distribution and morphology (contour interval = 5m).

Figure DR2. Uninterpreted version of seismic line (C-D) shown in Figure 3.

Table DR1. Mound morphology, dimension, and geophysical signatures.

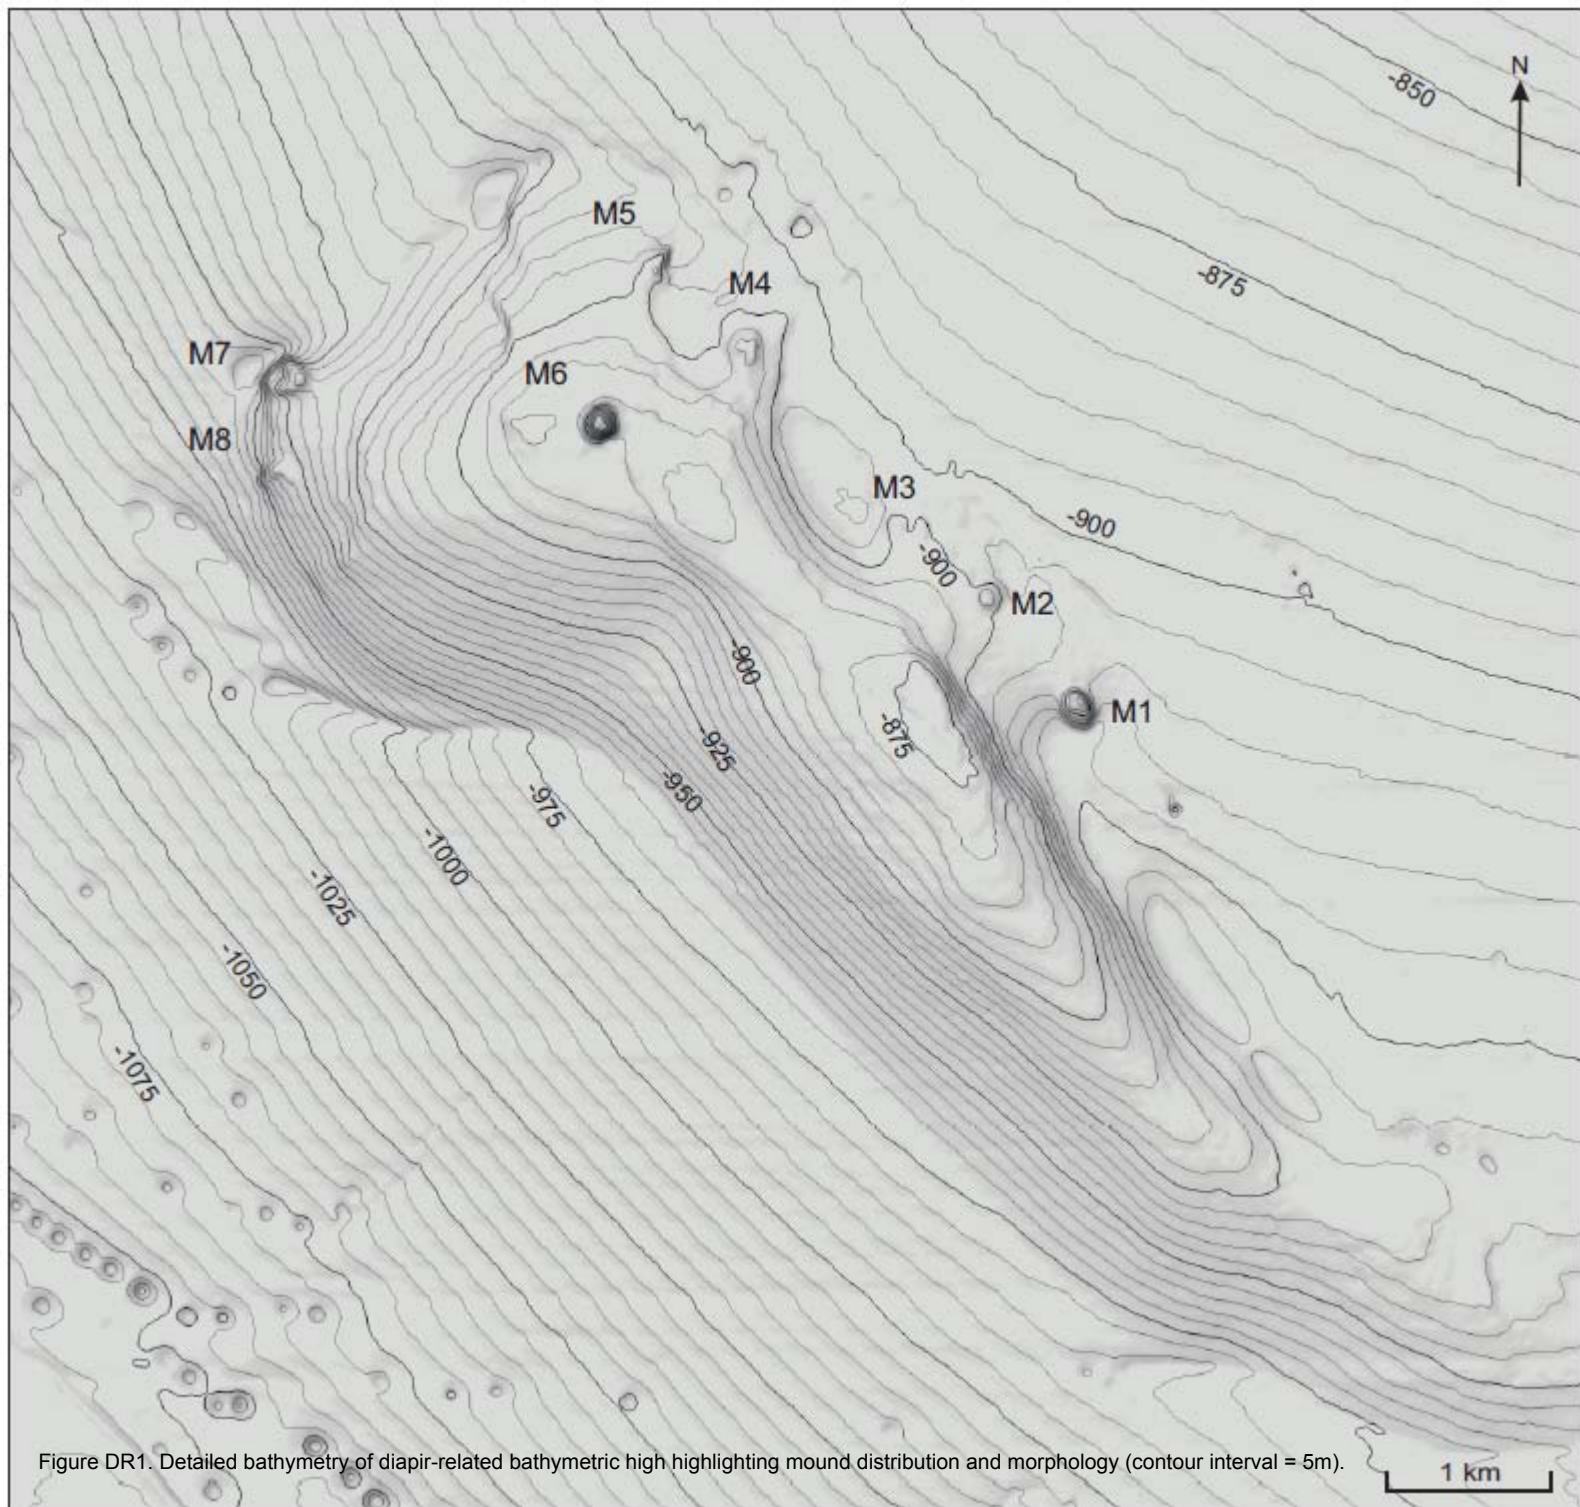

Figure DR2. Uninterpreted version of seismic line (C-D) shown in Figure 3.

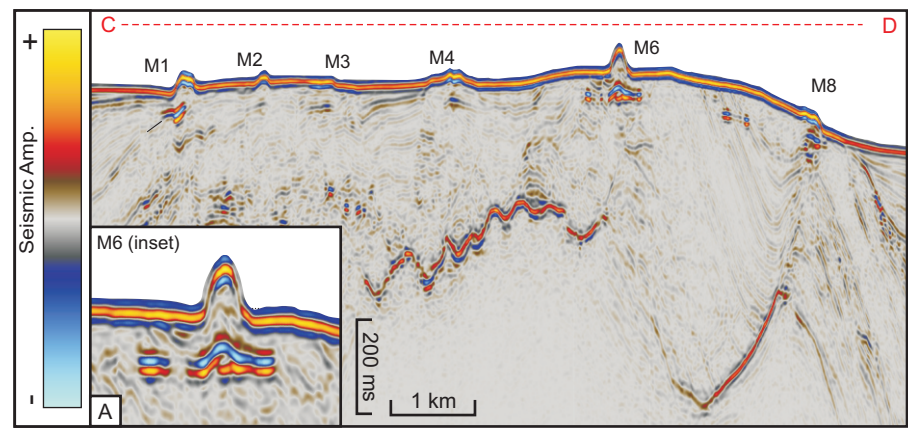

Table DR1. Mound morphology, dimension, and geophysical signatures.

| Mounds | Morphology                              | Dimension (m)          |       |        | Average slope grad. (°) | Geophysical signatures |          |
|--------|-----------------------------------------|------------------------|-------|--------|-------------------------|------------------------|----------|
|        |                                         | Height (up-down slope) | Width | Length |                         | Seafloor Amp.          | BSR Amp. |
| 1      | Smooth, well rounded, steep sided mound | 35                     | 230   | 270    | 16                      | High                   | High     |
| 2      | Smooth, well rounded, steep sided mound | 10-15                  | 150   | 180    | 9                       | Moderate               | Moderate |
| 3      | Rough, uneven, gently dipping mound     | 5                      | 160   | 250    | 3                       | High                   | Low      |
| 4      | Rough, uneven, gently dipping mound     | 5-10                   | 220   | 270    | 4                       | High                   | Low      |
| 5      | Rough, uneven, gently dipping mound     | 5-10                   | 80    | 150    | 7                       | High                   | Moderate |
| 6      | Smooth, well rounded, steep sided mound | 40                     | 270   | 290    | 16                      | Moderate               | High     |
| 7      | Rough, uneven, gently dipping mound     | 5-40                   | 280   | 300    | 9                       | High                   | Low      |
| 8      | Rough, uneven, gently dipping mound     | 5-30                   | 190   | 200    | 10                      | High                   | Moderate |
